# Supplementary material for: Impact of cirrus on extratropical tropopause structure
Source: Copernicus journal article supplement (doi:10.5194/acp-25-13077-2025), 2025-10-21
Supplement: Supplementary file [file acp-25-13077-2025-supplement-title-page.pdf › acp-25-13077-2025-supplement-title-page.pdf]

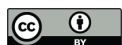

## *Supplement of*

# **Impact of cirrus on extratropical tropopause structure**

**Nicolas Emig et al.**

*Correspondence to:* Nicolas Emig ([niemig@uni-mainz.de](mailto:niemig@uni-mainz.de))

- [acp-25-13077-2025-supplement-title-page.pdf](#)
- [A\\_02.gif](#)

The copyright of individual parts of the supplement might differ from the article licence.
